# Supplementary material
Source: PubMed Central journal article supplement (PMC4012606)
Supplement: supp_pp.114.238840_238840revSupplemental_Figures.pdf [file supp_pp.114.238840_238840revSupplemental_Figures.pdf]

1 cttttaaaaaatcccctccaataatcacctttccctctc  
39 tgcacatagaaacttcttcgcttctcgtctcatctcatctcatcc  
74 **ATGGCGTCCGATCTCTCAACAAAAGCTAAAGAAGCATAACATCGAC**  
M **[A S D L S T K A K E A Y I D**  
119 **GATCACTTTGAACTCGCCGTTAACCTGTA**CTCTCAAGCCATTGCT  
**D H F E L A V N L Y S Q A I A**  
164 **GTTACTCCTAATAATCCCGAACTTTTCGTTGACCGTGCTCAAGCT**  
**V T P N N][P E L F V D R A Q A**  
209 **AATATCAA**ACTCCACA**ACTTCACCGAAGCTGTTACTGATGCAAAC**  
**N I K L H N F T E A V T D A N**  
254 **ACGGCGATTGAGTTAGATCCATCAACGGCAAACGCATATATGCGC**  
**T A I E L D P S T][A N A Y M R**  
299 **AAGGGTTTGGCCTGTATGGA**ACTTGAAGAGTACCAA**ACTGCGAAG**  
**K G L A C M E L E E Y Q T A K**  
344 **GCAGCTCTGGAA**ACTGGT**GCTTCTTTAGCACCAGGAGAATCAAGA**  
**A A L E T G A S L A P G E]** S R  
389 **TTC**ACTAGCTTAATCAAAGAATGTGATGAACACATTGCAGGGAAA  
F T S L I K E C D E H I A G K  
434 **GCTGGAGA**ATTGCCTAAGCATGCAACAGTTGAAACCTCAGCAAGT  
A G E L P K H A T V E T S A S  
479 **GTTGTCCCTCCTGCTGAATCAAAGTCACTGGATAATGTTGCTGCT**  
V V P P A E S K S L D N V A A  
524 **GTTACAAAAGATA**CCCAACTGGCTTATAAATCCTGTGAAAGAACA  
V T K D T Q L A Y K S C E R T  
569 **CCTGCTGTCAAACCAA**AATACAGGCATGAATTCTATCAGAAACCA  
P A V **[K P K Y R H E F Y Q K P**  
614 **GAGGAGGTGGTGGTA**ACCATATTTGCCAAGGGTATACCTGCCAAG  
**E E V V V T I F A K G I P A K**  
659 **AATGTTTCAGTTGACTTTGGCGAACA**AATACTTAGTGTTAGCATT  
**N V S V D F G E Q I L S V S I**  
704 **GATATA**CCAGGCGAAGTTGCATACTCTTCCAGCCTAGGTTGTT**C**  
**D I P G E V A Y S F Q P R L F**  
749 **GGTAAGATA**ATACCTCAAAAATGCAGATATGAAGTTATGTCTACC  
**G K I I P Q K C R Y E V M S T**  
794 **AAATTTGAGATT**CGCCTTGCTAAAGCTGAATCTGTACTACTGGACA  
**K F E I R L A K A E S V H W T**  
839 **ACCCTTGAGTATA**CTAGGGATATTGCTGTAGTACAGAGGCCAAAT  
**T L E]** Y T R D I A V V Q R P N  
884 **GTGTCATCAGGCAGCTATAAGCCTAGCTACCCTTCCTCTAAATTG**  
V S S G S Y K P **[S Y P S S K L**  
929 **AGATGCAAGGATTGGGATA**AACTAGAGGCTCAAGTAAAAAGGAG  
**R C K D W D K L E A Q V K K E**  
974 **GAAAAAGAAGAAAA**ACTGGATGGAGATGCAGCATTGAACAAATTT  
**E K E E K L D G D A A L N K F**  
1019 **TTCCGAGATATTTACAA**AGATGCTGATGAGGATGCAAGAAGAGCT  
**F R D I Y K D A D E D A R R A**  
1064 **ATGATGAAATC**ATTTGTGGAATCAAATGGGACTGTTCTGTCCACA  
**M M K S F V E S N G T V L S T**  
1109 **AACTGGAAAGAGGTTGGT**ACTAAGAAGGTGGAAGGAAGCCCTCCA  
**N W K E V G T K K V E G S P P**  
1154 **GATGGCATGGAGCTGAAGCAATGGGA**ATACTAGaaaatgtagctc  
**D G M E L K Q W E Y]** \*  
1199 ctctttatcttttgcgaccatttcctgcatttcctttt

**Supplemental Figure S1. Kim et al.**

```

(-----TPR domain-----
CaSGT1 ----MASDLSTKAKEAYIDDFELAVNLYSQAIAVTFNNPELFDRAQANIKLHNFTEAV 56
NtSGT1 ----MASDLETRAKEAFIDDFELAVDLYTQAIAMTPKNAELFADRAQANIKLNYFTEAV 56
CaSgt1b ----MASDLETRAKEAFIDDFELAVDLYTQAISSLSPKNPELFDRAQANIKLNYFTEAV 56
OsSgt1  MATAAASDLESKAKAAAFVDDDFELAAELYTQAIETASAPATAELYADRAQAHIKLGNYTEAV 60
AtSGT1a ----MAKELADKAKEAFVDDDFDVAVDLYSKAIDLDPNCAEFFADRAQAYIKLESFTEAV 56
AtSGT1b ----MAKELAEKAKEAFVDDDFDVAVDLYSKAIDLDPNCAEFFADRAQANIKLIDNFTEAV 56

-----)

CaSGT1 TDANTAIELDPSTANAYMRKGLACMELEEYQTAKAALETGASLAPGESRFTSLIKECDEH 116
NtSGT1 VDANKAIELDPSMSKAYLRKGLACMKLEEYQTAKAALETGASLAPAESRFTKLIKECDEH 116
CaSgt1b VDANKAIELDPYMSKAYLRKGLACMKLEEYQTAKAALETGASLAPGESRFTKLMKECDES 116
OsSgt1  ADANKAIELDPSMHKAYLRKGAACIRLEEYQTAKAALELGYSFASGDSRFTRLMKECDEH 120
AtSGT1a ADANKAIELDPSLTKAYLRKGTACMKLEEYRTAKTALEKASITPSESKEFKKLIDECNFL 116
AtSGT1b VDANKAIELEPTLAKAYLRKGTACMKLEEYSTAKAALEKASVAPNEPKFKKMIDECDLR 116

(=====
CaSGT1 IAGKAGELPKHATVETSASVPPAESKSLDNVAAVTKDTQLAYKSCERTPAVKPKYRHEF 176
NtSGT1 IAEEAGELPNQSVDKTSGNVVAPPASESLDNVAVAPKDAQPTVNLSYQGSAAAPKYRHEF 176
CaSgt1b IAEEAGELPNISLEKPSANAVASSASESLDNVAIAPRDPQSTVTLSHQESAAAPKYRHEF 176
OsSgt1  IAEEELTEVP---VKKAEDGAAAPSVASFVE-----EKDDAANMNDTPPMVEVKPKYRHDF 172
AtSGT1a ITEEEKDLVQVPVSTLPSSVTAPPVS-----ELDVTPT-----AK--YRHEY 156
AtSGT1b IAEEEKDLVQPMPPSLPSSSTTPLAT-----EADAPPVPIPAAPAKPMEYRHEF 164

=====CS domain=====
CaSGT1 YQKPEEVVVVTFIFAKGIPAKNVSVDFGEQILSVSIDIPEGEVAYSFQPRLFCKIIPQKCRYE 236
NtSGT1 YQKPEEVVVVTFIFAKGIPAKNVVDFGEQILSVSIDIPEGEVAYSFQPRLFCKIIPQKCRYE 236
CaSgt1b YQKPEEVVVVTFIFAKGIPAKNVVDFGEQILSVSIDIPEGEVAYSFQPRLFCKIIPQKCRYE 236
OsSgt1  YNSATEVVLTFIFAKGVPAENVVDFGEQMLSVSIEVPGEEPYHFQPRLFCKIIPKESRYQ 232
AtSGT1a YQKPEEVVVVTFIFAKGIPKQNVNIDFGEQILSVVIEVPGEDAYYLQPRLFCKIIPDKCKYE 216
AtSGT1b YQKPEEAVVTIFAKKVPKENVTFEFGQILSVVIDVAGEEAYHLQPRLFCKIIPKCRFE 224

=====)
CaSGT1 VMSTKFEIRLAKAESVHWTTLEYTRDIAVVQRPNVS--SGSYKPSYPSSKLRCKDWDKLE 294
NtSGT1 VMSTKIEIRLAKAEPLHWTSLLEYTRASAVVQRPNVS--SDAPRPSYPSSKLRHVDWDKLE 294
CaSgt1b VMSTKIEIRLAKAEPLHWTSLDYTREPVVILHRPVVS--SAAPRPSYPSSKLRNVWDKLE 294
OsSgt1  VLSTKVEIRLAKAEQITWTSLDYDKKPKAVPQKIIPPAESAQRPSYPSSKSK-KDWDKLE 291
AtSGT1a VLSTKIEIRLAKADIITWASLEHGKGPVAVLPKPNVS--SEVSQRPAYPSSKLV-KDWDKLE 274
AtSGT1b VLSTKVEIRLAKAEIITWASLEYGKQSVLPKPNVS--SALSQRFPVYPSSKPA-KDWDKLE 282

*****SGS domain*****
CaSGT1 AOVKKEEKEKLDGDAALNKFFRDIYKDADEDARRAMKSEFVESNGTVLSTNWKVEVGTKK 354
NtSGT1 AEVKKEEKDEKLDGDAALNKFFRDIYKDADEDTRRAMKSEFVESNGTVLSTNWKVEVGTKK 354
CaSgt1b AOVKKEEKEKLDGDAALNKFFRDIYKDADEDTRRAMKSEFVESNGTVLSTNWKVEVGTKK 354
OsSgt1  AEVKKEEKEEKLEGDAALNKFFRDIYSDAEDMRRAMKSEFVESNGTVLSTNWKDVGSKK 351
AtSGT1a AEVKKQEKDEKLEGDAALNKFFREIYQNAEDMRRAMKSEFVESNGTVLSTNWKQEVGTKT 334
AtSGT1b AEVKKQEKDEKLDGDAAMNKFFSDIYSSAEDMRRAMKSEFAESNGTVLSTNWKVEVGTKK 342

*****
CaSGT1 VEGSPPDGMELKQWEY 370
NtSGT1 VEGSPPDGMELKKWEI 370 (79%)
CaSgt1b VEGSPPDGMELKKWEI 370 (77%)
OsSgt1  VEGSPPDGMELKKWEY 367 (64%)
AtSGT1a IESTPPDGMELKKWEI 350 (63%)
AtSGT1b VESTPPDGMELKKWEY 358 (62%)

```

Supplemental Figure S2. Kim et al..

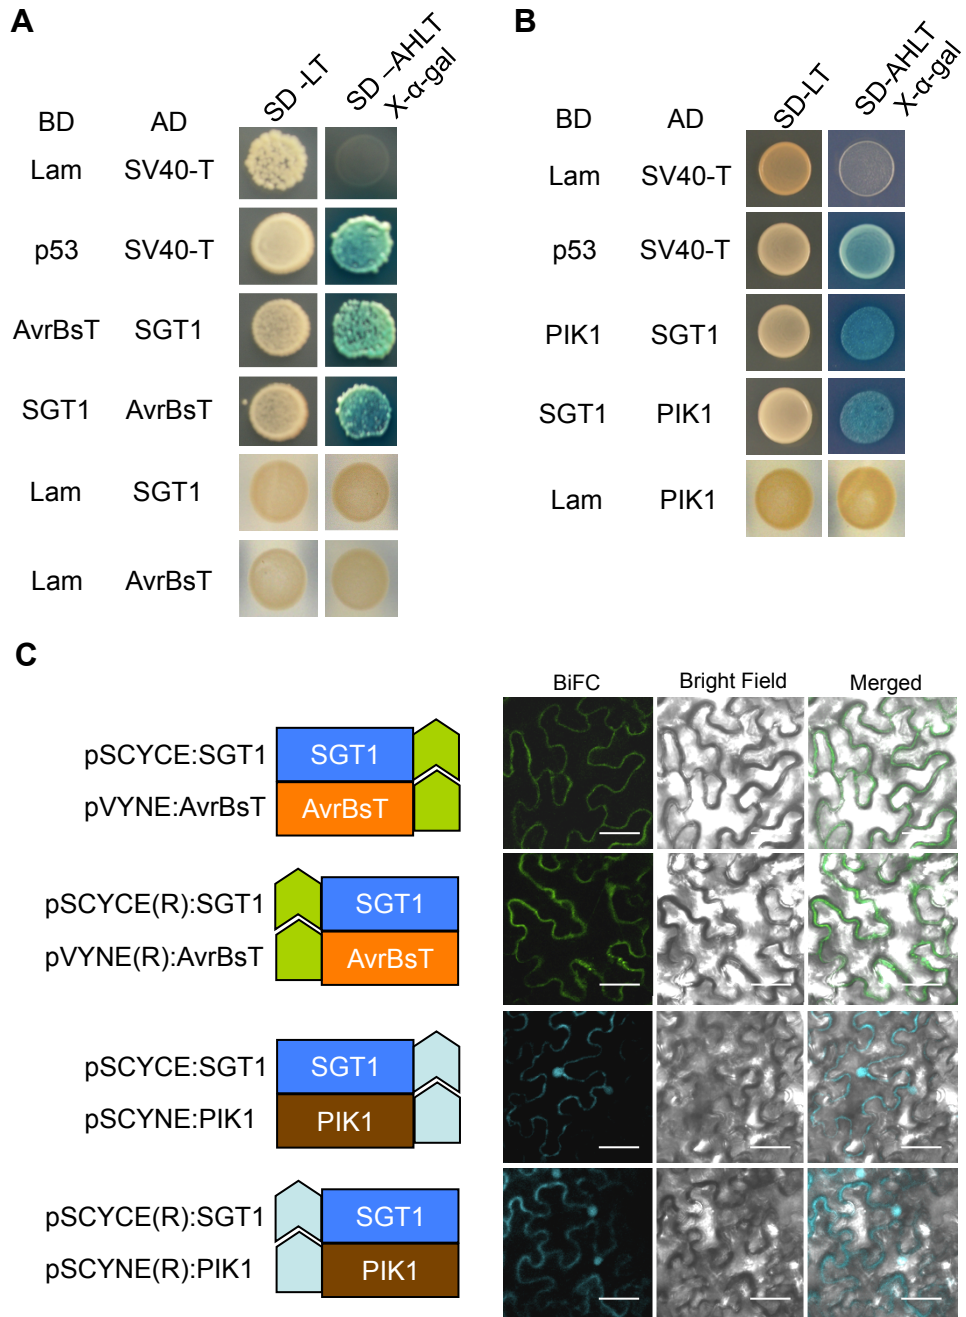

Supplemental Figure S3. Kim et al.

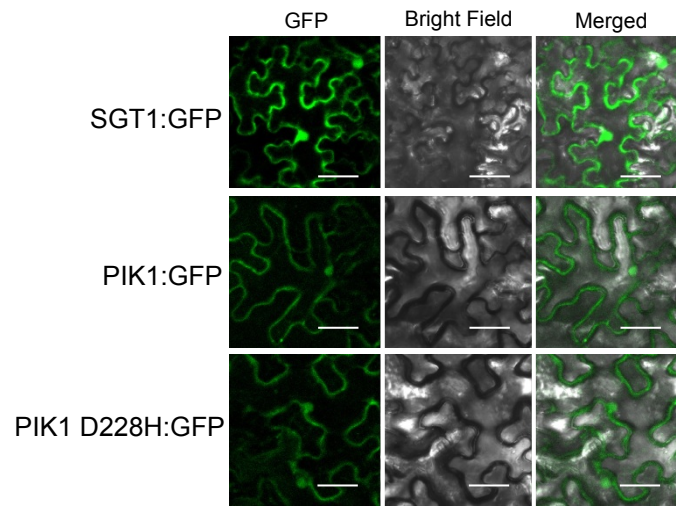

**Supplemental Figure S4. Kim et al.**

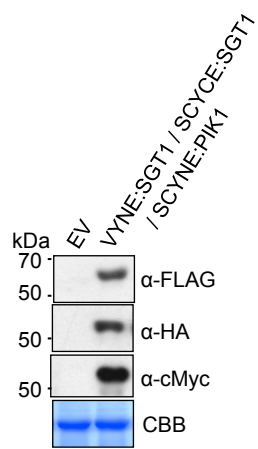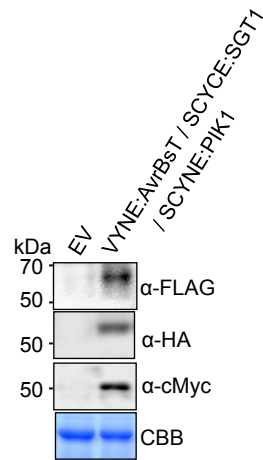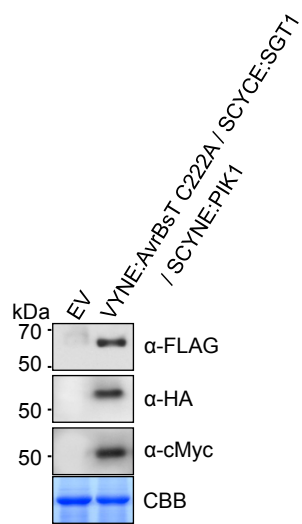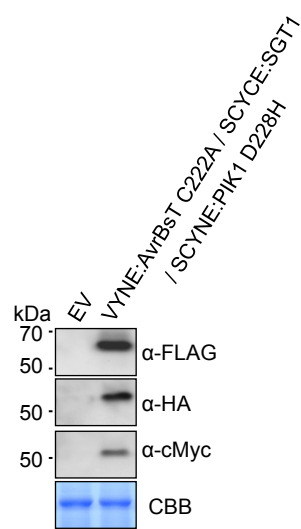

Supplemental Figure S5. Kim et al.

**A**

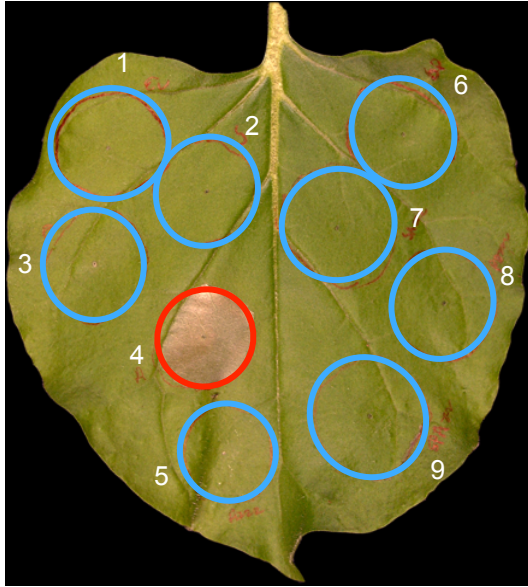

1. 35S:00
2. 35S:SGT1
3. 35S:PIK1
4. 35S:avrBsT
5. 35S:avrBsT C222A
6. 35S:SGT1/  
35S:PIK1
7. 35S:SGT1/  
35S:avrBsT C222A
8. 35S:PIK1/  
35S:avrBsT C222A
9. 35S:SGT1/  
35S:PIK1/  
35S:avrBsT C222A

**B**

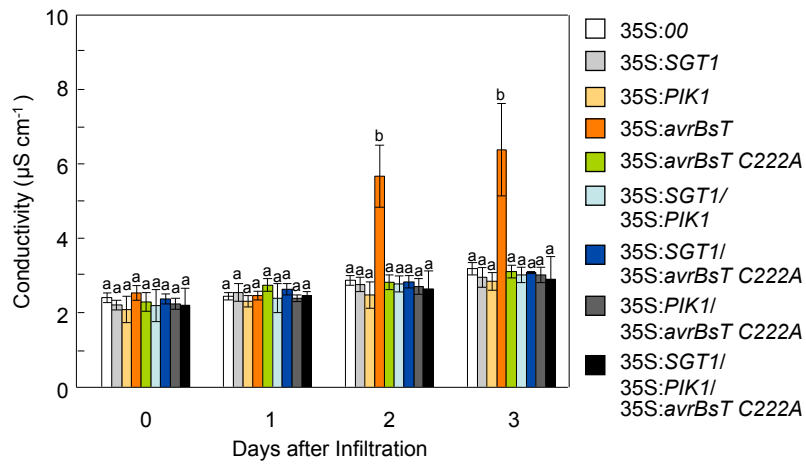

**Supplemental Figure S6. Kim et al.**

**A**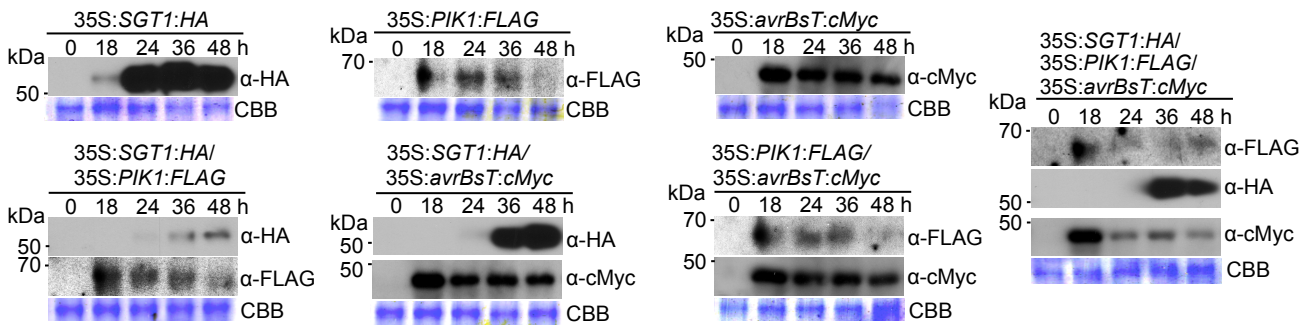**B**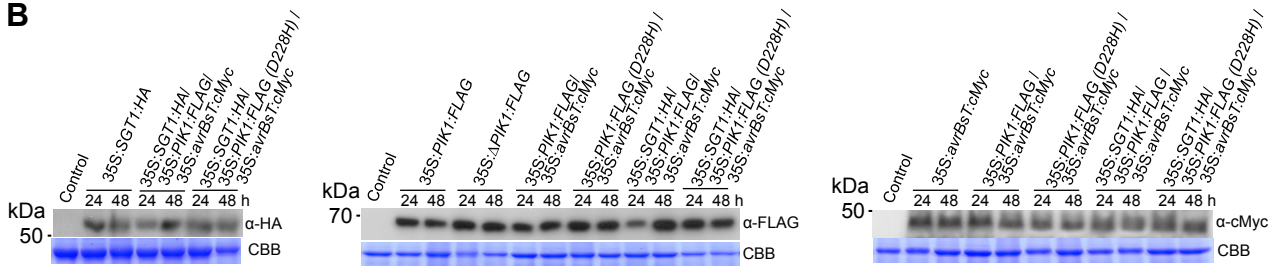

Supplemental Figure S7. Kim et al.

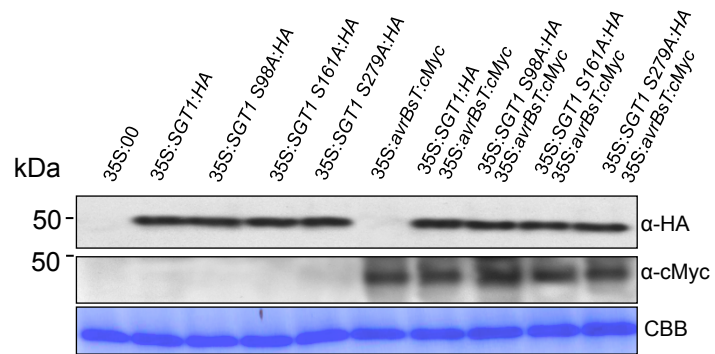

Supplemental Figure S8. Kim et al.



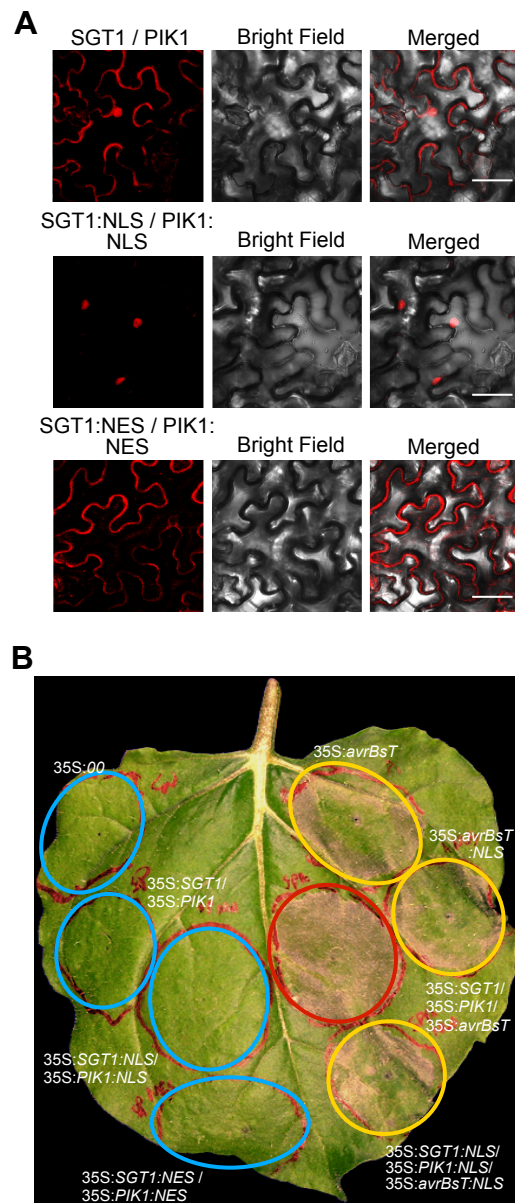

Supplemental Figure S9. Kim et al.

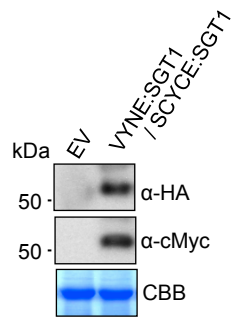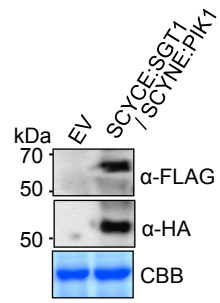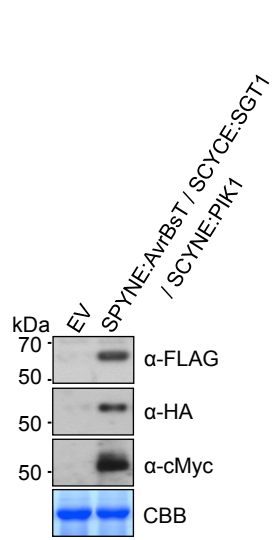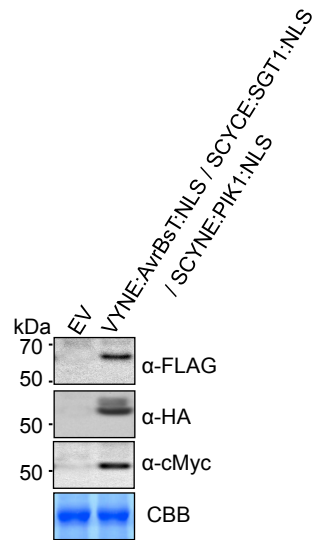

Supplemental Figure S10. Kim et al.

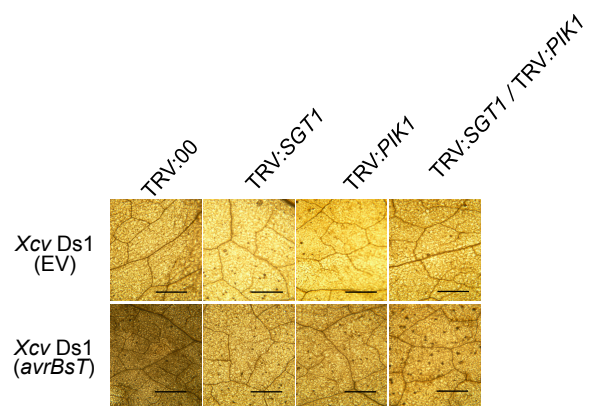

**Supplemental Figure S11. Kim et al.**

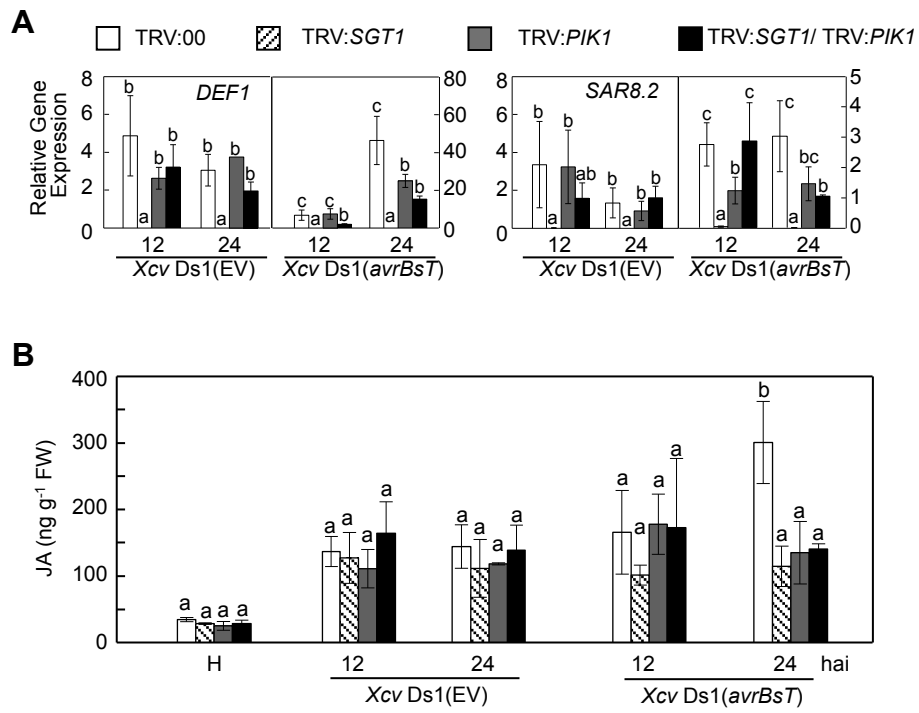

Supplemental Figure S12. Kim et al.
